# Supplementary material for: Urban children’s connections to nature and environmental behaviors differ with age and gender
Source: PLoS One. 2021 Jul 29;16(7):e0255421. doi: 10.1371/journal.pone.0255421 (PMC8321113; doi:10.1371/journal.pone.0255421)
Supplement: S1 Table — (XLSX) [file pone.0255421.s005.xlsx]

## Sheet: Sheet1
Age (years)	Number of respondents
	girls	boys	pooled
8	30	34	64
9	56	40	96
10	23	20	43
11	34	37	71
12	175	139	314
13	186	144	330
14	65	54	119
	569	468	1037
